# Supplementary material
Source: publisher figshare collection journal article supplement (https://acs.figshare.com/ndownloader/files/4401553)
Supplement: Supplementary file 1 [file 4401553]

 
data_x09058 
 
_audit_creation_method            SHELXL-97 
_chemical_name_systematic 
;2-Isopropyl-7-methyl-4-oxo-1-aza-
 spiro[5.5]undecane-1-carboxylic acid tert-butyl ester
; 
_chemical_name_common ?             
_chemical_melting_point           ? 
_chemical_formula_moiety          ? 
_chemical_formula_sum 
 'C19 H33 N O3' 
_chemical_formula_weight          323.46 
 
loop_ 
 _atom_type_symbol 
 _atom_type_description 
 _atom_type_scat_dispersion_real 
 _atom_type_scat_dispersion_imag 
 _atom_type_scat_source 
 'C'  'C'   0.0181   0.0091 
 'International Tables Vol C Tables 4.2.6.8 and 6.1.1.4' 
 'H'  'H'   0.0000   0.0000 
 'International Tables Vol C Tables 4.2.6.8 and 6.1.1.4' 
 'N'  'N'   0.0311   0.0180 
 'International Tables Vol C Tables 4.2.6.8 and 6.1.1.4' 
 'O'  'O'   0.0492   0.0322 
 'International Tables Vol C Tables 4.2.6.8 and 6.1.1.4' 
 
_symmetry_cell_setting            'monoclinic' 
_symmetry_space_group_name_H-M    'P 21/n' 
 
loop_ 
 _symmetry_equiv_pos_as_xyz 
 'x, y, z' 
 '-x+1/2, y+1/2, -z+1/2' 
 '-x, -y, -z' 
 'x-1/2, -y-1/2, z-1/2' 
 
_cell_length_a                    9.2852(3) 
_cell_length_b                    10.9825(4) 
_cell_length_c                    18.1638(6) 
_cell_angle_alpha                 90.00 
_cell_angle_beta                  92.663(2) 
_cell_angle_gamma                 90.00 
_cell_volume                      1850.25(11) 
_cell_formula_units_Z             4 
_cell_measurement_temperature     110 
_cell_measurement_reflns_used    2851
_cell_measurement_theta_min        4.71
_cell_measurement_theta_max       68.79
_exptl_crystal_description       'prism'
_exptl_crystal_colour            'colourless'
_exptl_crystal_size_max           0.33 
_exptl_crystal_size_mid           0.18 
_exptl_crystal_size_min           0.09 
_exptl_crystal_density_meas       ? 
_exptl_crystal_density_diffrn     1.161 
_exptl_crystal_density_method     'not measured' 
_exptl_crystal_F_000              712 
_exptl_absorpt_coefficient_mu     0.609 
_exptl_absorpt_correction_type    'multi-scan' 
_exptl_absorpt_correction_T_min   0.8244 
_exptl_absorpt_correction_T_max   0.9473 
_exptl_absorpt_process_details    'SADABS' 
 
_exptl_special_details 
; 
 ? 
; 
 
_diffrn_ambient_temperature       110 
_diffrn_radiation_wavelength      1.54180 
_diffrn_radiation_type            CuK\a 
_diffrn_radiation_source          'fine-focus sealed tube' 
_diffrn_radiation_monochromator   graphite 
_diffrn_measurement_device_type   'Bruker Apex2' 
_diffrn_measurement_method        'omega and phi scans' 
_diffrn_detector_area_resol_mean  ? 
_diffrn_standards_number          ? 
_diffrn_standards_interval_count  ? 
_diffrn_standards_interval_time   ? 
_diffrn_standards_decay_%         ? 
_diffrn_reflns_number             12960 
_diffrn_reflns_av_R_equivalents   0.0415 
_diffrn_reflns_av_sigmaI/netI     0.0335 
_diffrn_reflns_limit_h_min        -11 
_diffrn_reflns_limit_h_max        9 
_diffrn_reflns_limit_k_min        -13 
_diffrn_reflns_limit_k_max        13 
_diffrn_reflns_limit_l_min        -22 
_diffrn_reflns_limit_l_max        21 
_diffrn_reflns_theta_min          4.71 
_diffrn_reflns_theta_max          69.59 
_reflns_number_total              3436 
_reflns_number_gt                 2781 
_reflns_threshold_expression      >2sigma(I) 
 
_computing_data_collection        'Apex2' 
_computing_cell_refinement        'SAINT' 
_computing_data_reduction         'SAINT' 
_computing_structure_solution     'SIR92'
_computing_structure_refinement   'XL'
_computing_molecular_graphics     'NRCVAX' 
_computing_publication_material   'cif2tables.py' 
 
_refine_special_details 
; 
 Refinement of F^2^ against ALL reflections.  The weighted R-factor wR and 
 goodness of fit S are based on F^2^, conventional R-factors R are based 
 on F, with F set to zero for negative F^2^. The threshold expression of 
 F^2^ > 2sigma(F^2^) is used only for calculating R-factors(gt) etc. and is 
 not relevant to the choice of reflections for refinement.  R-factors based 
 on F^2^ are statistically about twice as large as those based on F, and R- 
 factors based on ALL data will be even larger. 
; 
 
_refine_ls_structure_factor_coef  Fsqd  
_refine_ls_matrix_type            full 
_refine_ls_weighting_scheme       calc  
_refine_ls_weighting_details 
 'calc w=1/[\s^2^(Fo^2^)+(0.0489P)^2^+0.1659P] where P=(Fo^2^+2Fc^2^)/3' 
_atom_sites_solution_primary      direct 
_atom_sites_solution_secondary    difmap 
_atom_sites_solution_hydrogens    geom 
_refine_ls_hydrogen_treatment     refall
_refine_ls_extinction_method      none 
_refine_ls_extinction_coef        ? 
_refine_ls_number_reflns          3436 
_refine_ls_number_parameters      340 
_refine_ls_number_restraints      0 
_refine_ls_R_factor_all           0.0497 
_refine_ls_R_factor_gt            0.0378 
_refine_ls_wR_factor_ref          0.0971 
_refine_ls_wR_factor_gt           0.0915 
_refine_ls_goodness_of_fit_ref    1.059 
_refine_ls_restrained_S_all       1.059 
_refine_ls_shift/su_max           0.000 
_refine_ls_shift/su_mean          0.000 
 
loop_ 
 _atom_site_label 
 _atom_site_type_symbol 
 _atom_site_fract_x 
 _atom_site_fract_y 
 _atom_site_fract_z 
 _atom_site_U_iso_or_equiv 
 _atom_site_adp_type 
 _atom_site_occupancy 
 _atom_site_symmetry_multiplicity 
 _atom_site_calc_flag 
 _atom_site_refinement_flags 
 _atom_site_disorder_assembly 
 _atom_site_disorder_group 
O1 O 0.09486(11) 0.43647(10) 0.56535(5) 0.0376(3) Uani 1 1 d . . . 
O2 O 0.52161(10) 0.17369(9) 0.36561(5) 0.0283(2) Uani 1 1 d . . . 
O3 O 0.55178(10) 0.37407(8) 0.34198(5) 0.0262(2) Uani 1 1 d . . . 
N1 N 0.36295(12) 0.31604(10) 0.40736(6) 0.0229(3) Uani 1 1 d . . . 
C1 C 0.27281(14) 0.22162(12) 0.44371(7) 0.0234(3) Uani 1 1 d . . . 
C2 C 0.14121(15) 0.28533(13) 0.47587(8) 0.0262(3) Uani 1 1 d . . . 
H2A H 0.0710(17) 0.3016(14) 0.4345(9) 0.030(4) Uiso 1 1 d . . . 
H2B H 0.0928(18) 0.2313(15) 0.5098(9) 0.034(4) Uiso 1 1 d . . . 
C3 C 0.16478(15) 0.40594(14) 0.51353(7) 0.0281(3) Uani 1 1 d . . . 
C4 C 0.27611(17) 0.48691(14) 0.48184(8) 0.0286(3) Uani 1 1 d . . . 
H4A H 0.3579(18) 0.4877(15) 0.5172(9) 0.033(4) Uiso 1 1 d . . . 
H4B H 0.2415(18) 0.5699(16) 0.4798(9) 0.036(4) Uiso 1 1 d . . . 
C5 C 0.32065(15) 0.44634(12) 0.40543(7) 0.0246(3) Uani 1 1 d . . . 
H5 H 0.4104(15) 0.4909(13) 0.3940(7) 0.020(3) Uiso 1 1 d . . . 
C6 C 0.36421(15) 0.15425(13) 0.50522(7) 0.0253(3) Uani 1 1 d . . . 
H6 H 0.4455(16) 0.1197(14) 0.4802(8) 0.025(4) Uiso 1 1 d . . . 
C7 C 0.28181(16) 0.04746(14) 0.53803(8) 0.0305(3) Uani 1 1 d . . . 
H7A H 0.3483(17) 0.0070(15) 0.5754(9) 0.033(4) Uiso 1 1 d . . . 
H7B H 0.1966(18) 0.0786(15) 0.5664(9) 0.033(4) Uiso 1 1 d . . . 
C8 C 0.22751(17) -0.04183(14) 0.47883(9) 0.0350(4) Uani 1 1 d . . . 
H8A H 0.313(2) -0.0794(16) 0.4549(9) 0.042(5) Uiso 1 1 d . . . 
H8B H 0.1752(18) -0.1107(16) 0.5032(9) 0.038(4) Uiso 1 1 d . . . 
C9 C 0.13332(17) 0.02243(14) 0.42032(8) 0.0336(3) Uani 1 1 d . . . 
H9A H 0.0436(18) 0.0533(15) 0.4417(9) 0.035(4) Uiso 1 1 d . . . 
H9B H 0.105(2) -0.0378(17) 0.3807(10) 0.046(5) Uiso 1 1 d . . . 
C10 C 0.21454(16) 0.12809(14) 0.38623(8) 0.0283(3) Uani 1 1 d . . . 
H10A H 0.1493(18) 0.1709(15) 0.3518(9) 0.031(4) Uiso 1 1 d . . . 
H10B H 0.2962(17) 0.0950(14) 0.3595(8) 0.029(4) Uiso 1 1 d . . . 
C11 C 0.42668(17) 0.23751(15) 0.56579(8) 0.0310(3) Uani 1 1 d . . . 
H11A H 0.3495(19) 0.2810(15) 0.5942(9) 0.037(4) Uiso 1 1 d . . . 
H11B H 0.4879(19) 0.3008(16) 0.5471(9) 0.037(4) Uiso 1 1 d . . . 
H11C H 0.4831(18) 0.1872(16) 0.6030(10) 0.038(4) Uiso 1 1 d . . . 
C12 C 0.20663(16) 0.48086(13) 0.34387(8) 0.0289(3) Uani 1 1 d . . . 
H12 H 0.1087(18) 0.4597(15) 0.3605(9) 0.034(4) Uiso 1 1 d . . . 
C13 C 0.2281(2) 0.41578(16) 0.27127(8) 0.0373(4) Uani 1 1 d . . . 
H13A H 0.1521(19) 0.4392(16) 0.2337(10) 0.042(5) Uiso 1 1 d . . . 
H13B H 0.229(2) 0.327(2) 0.2757(10) 0.056(6) Uiso 1 1 d . . . 
H13C H 0.322(2) 0.4416(18) 0.2498(11) 0.057(6) Uiso 1 1 d . . . 
C14 C 0.2112(2) 0.61796(16) 0.33140(10) 0.0421(4) Uani 1 1 d . . . 
H14A H 0.308(2) 0.6416(18) 0.3161(11) 0.054(6) Uiso 1 1 d . . . 
H14B H 0.189(2) 0.6674(19) 0.3749(11) 0.058(6) Uiso 1 1 d . . . 
H14C H 0.1435(19) 0.6391(16) 0.2909(10) 0.042(5) Uiso 1 1 d . . . 
C15 C 0.48143(14) 0.27890(12) 0.37101(7) 0.0235(3) Uani 1 1 d . . . 
C16 C 0.67387(15) 0.35339(13) 0.29405(7) 0.0264(3) Uani 1 1 d . . . 
C17 C 0.79894(16) 0.29377(15) 0.33709(9) 0.0333(3) Uani 1 1 d . . . 
H17A H 0.8233(19) 0.3457(16) 0.3819(10) 0.040(5) Uiso 1 1 d . . . 
H17B H 0.8832(19) 0.2943(16) 0.3081(9) 0.039(5) Uiso 1 1 d . . . 
H17C H 0.7787(17) 0.2062(16) 0.3513(9) 0.033(4) Uiso 1 1 d . . . 
C18 C 0.62463(17) 0.27980(14) 0.22663(8) 0.0297(3) Uani 1 1 d . . . 
H18A H 0.599(2) 0.1950(18) 0.2408(10) 0.045(5) Uiso 1 1 d . . . 
H18B H 0.7037(19) 0.2795(15) 0.1924(9) 0.038(5) Uiso 1 1 d . . . 
H18C H 0.543(2) 0.3181(17) 0.2014(9) 0.043(5) Uiso 1 1 d . . . 
C19 C 0.71190(19) 0.48237(15) 0.27193(9) 0.0352(4) Uani 1 1 d . . . 
H19A H 0.628(2) 0.5218(17) 0.2455(10) 0.043(5) Uiso 1 1 d . . . 
H19B H 0.7930(19) 0.4814(16) 0.2393(10) 0.042(5) Uiso 1 1 d . . . 
H19C H 0.7389(18) 0.5296(16) 0.3158(10) 0.040(5) Uiso 1 1 d . . . 
 
loop_ 
 _atom_site_aniso_label 
 _atom_site_aniso_U_11 
 _atom_site_aniso_U_22 
 _atom_site_aniso_U_33 
 _atom_site_aniso_U_23 
 _atom_site_aniso_U_13 
 _atom_site_aniso_U_12 
O1 0.0357(6) 0.0452(7) 0.0329(5) -0.0055(5) 0.0129(5) 0.0056(5) 
O2 0.0306(5) 0.0220(5) 0.0330(5) 0.0026(4) 0.0110(4) 0.0037(4) 
O3 0.0259(5) 0.0224(5) 0.0312(5) 0.0011(4) 0.0111(4) 0.0017(4) 
N1 0.0229(6) 0.0216(6) 0.0248(5) 0.0012(4) 0.0066(5) 0.0007(4) 
C1 0.0233(6) 0.0236(7) 0.0237(6) 0.0014(5) 0.0060(6) -0.0011(5) 
C2 0.0222(7) 0.0290(8) 0.0279(7) 0.0015(6) 0.0059(6) 0.0001(6) 
C3 0.0249(7) 0.0337(8) 0.0259(7) 0.0009(6) 0.0028(6) 0.0084(6) 
C4 0.0309(8) 0.0255(8) 0.0299(7) -0.0030(6) 0.0060(6) 0.0031(6) 
C5 0.0246(7) 0.0214(7) 0.0282(7) -0.0010(5) 0.0056(6) 0.0020(6) 
C6 0.0245(7) 0.0254(7) 0.0264(6) 0.0022(5) 0.0062(6) 0.0017(6) 
C7 0.0313(8) 0.0287(8) 0.0321(7) 0.0064(6) 0.0096(7) 0.0027(6) 
C8 0.0363(8) 0.0253(8) 0.0447(8) 0.0003(7) 0.0150(7) -0.0017(6) 
C9 0.0335(8) 0.0325(8) 0.0357(8) -0.0071(6) 0.0101(7) -0.0087(7) 
C10 0.0277(7) 0.0316(8) 0.0261(6) -0.0014(6) 0.0056(6) -0.0042(6) 
C11 0.0309(8) 0.0354(8) 0.0268(7) 0.0020(6) 0.0025(6) 0.0010(7) 
C12 0.0260(7) 0.0288(8) 0.0322(7) 0.0043(6) 0.0056(6) 0.0032(6) 
C13 0.0443(10) 0.0385(9) 0.0289(7) 0.0039(7) -0.0007(7) 0.0078(8) 
C14 0.0492(11) 0.0316(9) 0.0454(9) 0.0090(7) 0.0029(9) 0.0101(8) 
C15 0.0246(7) 0.0238(7) 0.0224(6) 0.0019(5) 0.0047(5) 0.0002(5) 
C16 0.0246(7) 0.0268(7) 0.0287(7) 0.0001(6) 0.0113(6) 0.0002(6) 
C17 0.0251(7) 0.0376(9) 0.0376(8) -0.0048(7) 0.0062(7) 0.0010(6) 
C18 0.0315(8) 0.0308(8) 0.0273(7) 0.0000(6) 0.0066(7) 0.0006(7) 
C19 0.0390(9) 0.0288(8) 0.0392(8) 0.0011(7) 0.0170(8) -0.0047(7) 
 
_geom_special_details 
; 
 All esds (except the esd in the dihedral angle between two l.s. planes) 
 are estimated using the full covariance matrix.  The cell esds are taken 
 into account individually in the estimation of esds in distances, angles 
 and torsion angles; correlations between esds in cell parameters are only 
 used when they are defined by crystal symmetry.  An approximate (isotropic) 
 treatment of cell esds is used for estimating esds involving l.s. planes. 
; 
 
loop_ 
 _geom_bond_atom_site_label_1 
 _geom_bond_atom_site_label_2 
 _geom_bond_distance 
 _geom_bond_site_symmetry_2 
 _geom_bond_publ_flag 
O1 C3 1.2152(17) . ? 
O2 C15 1.2196(16) . ? 
O3 C15 1.3525(16) . ? 
O3 C16 1.4787(16) . ? 
N1 C15 1.3711(17) . ? 
N1 C5 1.4839(17) . ? 
N1 C1 1.5044(17) . ? 
C1 C10 1.5445(19) . ? 
C1 C2 1.5461(19) . ? 
C1 C6 1.5582(18) . ? 
C2 C3 1.502(2) . ? 
C2 H2A 0.989(16) . ? 
C2 H2B 0.980(17) . ? 
C3 C4 1.499(2) . ? 
C4 C5 1.5327(18) . ? 
C4 H4A 0.972(17) . ? 
C4 H4B 0.966(17) . ? 
C5 C12 1.5508(19) . ? 
C5 H5 0.996(15) . ? 
C6 C11 1.524(2) . ? 
C6 C7 1.5357(19) . ? 
C6 H6 0.977(15) . ? 
C7 C8 1.524(2) . ? 
C7 H7A 1.000(16) . ? 
C7 H7B 1.023(17) . ? 
C8 C9 1.518(2) . ? 
C8 H8A 1.014(18) . ? 
C8 H8B 1.012(18) . ? 
C9 C10 1.530(2) . ? 
C9 H9A 0.995(17) . ? 
C9 H9B 1.003(18) . ? 
C10 H10A 0.972(16) . ? 
C10 H10B 0.989(16) . ? 
C11 H11A 1.021(18) . ? 
C11 H11B 0.969(18) . ? 
C11 H11C 1.001(18) . ? 
C12 C13 1.521(2) . ? 
C12 C14 1.524(2) . ? 
C12 H12 0.999(17) . ? 
C13 H13A 0.992(18) . ? 
C13 H13B 0.98(2) . ? 
C13 H13C 1.01(2) . ? 
C14 H14A 0.99(2) . ? 
C14 H14B 0.99(2) . ? 
C14 H14C 0.974(18) . ? 
C16 C17 1.518(2) . ? 
C16 C19 1.518(2) . ? 
C16 C18 1.5198(19) . ? 
C17 H17A 1.010(18) . ? 
C17 H17B 0.963(18) . ? 
C17 H17C 1.016(17) . ? 
C18 H18A 0.999(19) . ? 
C18 H18B 0.983(18) . ? 
C18 H18C 0.961(19) . ? 
C19 H19A 0.994(19) . ? 
C19 H19B 0.979(18) . ? 
C19 H19C 0.974(18) . ? 
 
loop_ 
 _geom_angle_atom_site_label_1 
 _geom_angle_atom_site_label_2 
 _geom_angle_atom_site_label_3 
 _geom_angle 
 _geom_angle_site_symmetry_1 
 _geom_angle_site_symmetry_3 
 _geom_angle_publ_flag 
C15 O3 C16 120.55(10) . . ? 
C15 N1 C5 119.54(11) . . ? 
C15 N1 C1 118.78(11) . . ? 
C5 N1 C1 121.54(11) . . ? 
N1 C1 C10 110.26(10) . . ? 
N1 C1 C2 108.63(11) . . ? 
C10 C1 C2 107.35(11) . . ? 
N1 C1 C6 110.27(11) . . ? 
C10 C1 C6 109.33(12) . . ? 
C2 C1 C6 110.96(11) . . ? 
C3 C2 C1 118.05(12) . . ? 
C3 C2 H2A 105.3(9) . . ? 
C1 C2 H2A 107.4(9) . . ? 
C3 C2 H2B 108.0(10) . . ? 
C1 C2 H2B 110.9(10) . . ? 
H2A C2 H2B 106.5(13) . . ? 
O1 C3 C4 122.45(14) . . ? 
O1 C3 C2 121.62(13) . . ? 
C4 C3 C2 115.90(12) . . ? 
C3 C4 C5 113.28(12) . . ? 
C3 C4 H4A 106.4(9) . . ? 
C5 C4 H4A 111.4(9) . . ? 
C3 C4 H4B 109.9(10) . . ? 
C5 C4 H4B 110.0(10) . . ? 
H4A C4 H4B 105.4(13) . . ? 
N1 C5 C4 109.96(11) . . ? 
N1 C5 C12 115.08(11) . . ? 
C4 C5 C12 112.21(12) . . ? 
N1 C5 H5 104.8(8) . . ? 
C4 C5 H5 108.0(8) . . ? 
C12 C5 H5 106.2(8) . . ? 
C11 C6 C7 110.97(12) . . ? 
C11 C6 C1 114.14(12) . . ? 
C7 C6 C1 112.10(11) . . ? 
C11 C6 H6 107.0(8) . . ? 
C7 C6 H6 107.1(9) . . ? 
C1 C6 H6 104.9(8) . . ? 
C8 C7 C6 111.85(12) . . ? 
C8 C7 H7A 111.5(9) . . ? 
C6 C7 H7A 107.4(9) . . ? 
C8 C7 H7B 109.5(9) . . ? 
C6 C7 H7B 110.6(9) . . ? 
H7A C7 H7B 105.9(12) . . ? 
C9 C8 C7 110.84(13) . . ? 
C9 C8 H8A 109.1(10) . . ? 
C7 C8 H8A 108.9(10) . . ? 
C9 C8 H8B 112.4(9) . . ? 
C7 C8 H8B 108.8(9) . . ? 
H8A C8 H8B 106.7(14) . . ? 
C8 C9 C10 110.91(13) . . ? 
C8 C9 H9A 110.6(9) . . ? 
C10 C9 H9A 109.7(10) . . ? 
C8 C9 H9B 108.6(10) . . ? 
C10 C9 H9B 109.1(10) . . ? 
H9A C9 H9B 107.9(14) . . ? 
C9 C10 C1 113.23(11) . . ? 
C9 C10 H10A 108.8(10) . . ? 
C1 C10 H10A 107.6(9) . . ? 
C9 C10 H10B 108.9(9) . . ? 
C1 C10 H10B 108.9(9) . . ? 
H10A C10 H10B 109.3(12) . . ? 
C6 C11 H11A 113.1(10) . . ? 
C6 C11 H11B 112.8(10) . . ? 
H11A C11 H11B 106.2(13) . . ? 
C6 C11 H11C 109.0(10) . . ? 
H11A C11 H11C 105.9(13) . . ? 
H11B C11 H11C 109.5(14) . . ? 
C13 C12 C14 109.25(13) . . ? 
C13 C12 C5 113.43(12) . . ? 
C14 C12 C5 109.02(13) . . ? 
C13 C12 H12 108.1(9) . . ? 
C14 C12 H12 107.9(10) . . ? 
C5 C12 H12 109.0(9) . . ? 
C12 C13 H13A 110.9(10) . . ? 
C12 C13 H13B 113.4(11) . . ? 
H13A C13 H13B 108.4(15) . . ? 
C12 C13 H13C 110.6(11) . . ? 
H13A C13 H13C 105.1(15) . . ? 
H13B C13 H13C 108.0(16) . . ? 
C12 C14 H14A 109.5(12) . . ? 
C12 C14 H14B 114.5(12) . . ? 
H14A C14 H14B 107.8(16) . . ? 
C12 C14 H14C 109.0(10) . . ? 
H14A C14 H14C 106.9(15) . . ? 
H14B C14 H14C 108.8(15) . . ? 
O2 C15 O3 123.07(12) . . ? 
O2 C15 N1 125.17(12) . . ? 
O3 C15 N1 111.75(11) . . ? 
O3 C16 C17 110.62(11) . . ? 
O3 C16 C19 101.92(11) . . ? 
C17 C16 C19 110.92(13) . . ? 
O3 C16 C18 110.23(11) . . ? 
C17 C16 C18 112.32(12) . . ? 
C19 C16 C18 110.35(12) . . ? 
C16 C17 H17A 108.0(10) . . ? 
C16 C17 H17B 109.8(10) . . ? 
H17A C17 H17B 106.2(14) . . ? 
C16 C17 H17C 113.2(9) . . ? 
H17A C17 H17C 111.5(13) . . ? 
H17B C17 H17C 108.0(14) . . ? 
C16 C18 H18A 110.8(10) . . ? 
C16 C18 H18B 107.8(10) . . ? 
H18A C18 H18B 110.9(14) . . ? 
C16 C18 H18C 110.6(11) . . ? 
H18A C18 H18C 109.7(15) . . ? 
H18B C18 H18C 107.0(14) . . ? 
C16 C19 H19A 110.3(10) . . ? 
C16 C19 H19B 110.1(11) . . ? 
H19A C19 H19B 108.6(14) . . ? 
C16 C19 H19C 109.5(10) . . ? 
H19A C19 H19C 109.3(15) . . ? 
H19B C19 H19C 109.0(14) . . ? 
 
loop_ 
 _geom_torsion_atom_site_label_1 
 _geom_torsion_atom_site_label_2 
 _geom_torsion_atom_site_label_3 
 _geom_torsion_atom_site_label_4 
 _geom_torsion 
 _geom_torsion_site_symmetry_1 
 _geom_torsion_site_symmetry_2 
 _geom_torsion_site_symmetry_3 
 _geom_torsion_site_symmetry_4 
 _geom_torsion_publ_flag 
C15 N1 C1 C10 -58.77(15) . . . . ? 
C5 N1 C1 C10 116.78(13) . . . . ? 
C15 N1 C1 C2 -176.14(11) . . . . ? 
C5 N1 C1 C2 -0.59(15) . . . . ? 
C15 N1 C1 C6 62.06(14) . . . . ? 
C5 N1 C1 C6 -122.39(12) . . . . ? 
N1 C1 C2 C3 -41.09(15) . . . . ? 
C10 C1 C2 C3 -160.30(12) . . . . ? 
C6 C1 C2 C3 80.29(15) . . . . ? 
C1 C2 C3 O1 -147.10(13) . . . . ? 
C1 C2 C3 C4 34.62(18) . . . . ? 
O1 C3 C4 C5 -164.22(13) . . . . ? 
C2 C3 C4 C5 14.04(18) . . . . ? 
C15 N1 C5 C4 -138.29(12) . . . . ? 
C1 N1 C5 C4 46.19(16) . . . . ? 
C15 N1 C5 C12 93.84(14) . . . . ? 
C1 N1 C5 C12 -81.68(15) . . . . ? 
C3 C4 C5 N1 -52.17(16) . . . . ? 
C3 C4 C5 C12 77.27(15) . . . . ? 
N1 C1 C6 C11 59.13(15) . . . . ? 
C10 C1 C6 C11 -179.49(12) . . . . ? 
C2 C1 C6 C11 -61.27(15) . . . . ? 
N1 C1 C6 C7 -173.62(11) . . . . ? 
C10 C1 C6 C7 -52.24(15) . . . . ? 
C2 C1 C6 C7 65.97(15) . . . . ? 
C11 C6 C7 C8 -175.96(12) . . . . ? 
C1 C6 C7 C8 55.11(16) . . . . ? 
C6 C7 C8 C9 -56.58(16) . . . . ? 
C7 C8 C9 C10 56.45(16) . . . . ? 
C8 C9 C10 C1 -56.23(17) . . . . ? 
N1 C1 C10 C9 174.66(11) . . . . ? 
C2 C1 C10 C9 -67.18(15) . . . . ? 
C6 C1 C10 C9 53.27(16) . . . . ? 
N1 C5 C12 C13 -38.94(17) . . . . ? 
C4 C5 C12 C13 -165.66(13) . . . . ? 
N1 C5 C12 C14 -160.91(12) . . . . ? 
C4 C5 C12 C14 72.37(16) . . . . ? 
C16 O3 C15 O2 7.16(18) . . . . ? 
C16 O3 C15 N1 -173.71(11) . . . . ? 
C5 N1 C15 O2 -175.94(12) . . . . ? 
C1 N1 C15 O2 -0.30(19) . . . . ? 
C5 N1 C15 O3 4.95(16) . . . . ? 
C1 N1 C15 O3 -179.41(10) . . . . ? 
C15 O3 C16 C17 -64.94(15) . . . . ? 
C15 O3 C16 C19 177.07(11) . . . . ? 
C15 O3 C16 C18 59.89(15) . . . . ? 
 
_diffrn_measured_fraction_theta_max    0.987 
_diffrn_reflns_theta_full              69.59 
_diffrn_measured_fraction_theta_full   0.987 
_refine_diff_density_max    0.143 
_refine_diff_density_min   -0.180 
_refine_diff_density_rms    0.036 
